# Supplementary material for: Biochemical Methane Potential of a Biorefinery’s Process-Wastewater and its Components at Different Concentrations and Temperatures
Source: MDPI journal article supplement (doi:10.3390/fermentation8100476), 2022-09-22
Supplement: s1 [file s1]

**Table S1.** Two-way ANOVA analysis for the furanic compounds at  $\alpha = 0.05$ .

| Test Component   | Parameter       | DF | Sum of Squares | Mean square | F-value | p-value  | Summary                                                                                        |
|------------------|-----------------|----|----------------|-------------|---------|----------|------------------------------------------------------------------------------------------------|
| HMF              | Temperature     | 1  | 16645.752      | 16645.752   | 3.743   | 0.071    | At 0.05 level, the population means of Temperature are <b>not</b> significantly different      |
|                  | Concentration   | 3  | 116004.433     | 38668.144   | 8.694   | 0.001    | At 0.05 level, the population means of Temperature are significantly different                 |
|                  | Interaction     | 3  | 41151.767      | 13717.256   | 3.084   | 0.057    | At 0.05 level, the interaction between Temperature and Concentration is <b>not</b> significant |
|                  | Model           | 7  | 173801.952     | 24828.850   | 5.582   | 0.002    |                                                                                                |
|                  | Error           | 16 | 71162.345      | 4447.647    |         |          |                                                                                                |
|                  | Corrected Total | 23 | 244964.297     |             |         |          |                                                                                                |
| Furfural         | Temperature     | 1  | 11939.536      | 11939.536   | 7.036   | 0.017    | At 0.05 level, the population means of Temperature are significantly different                 |
|                  | Concentration   | 3  | 96903.150      | 32301.050   | 19.036  | 1.58E-05 | At 0.05 level, the population means of Concentration are significantly different               |
|                  | Interaction     | 3  | 26173.312      | 8724.437    | 5.142   | 0.011    | At 0.05 level, the interaction between Temperature and Concentration is significant            |
|                  | Model           | 7  | 135015.999     | 19288.000   | 11.367  | 3.67E-05 |                                                                                                |
|                  | Error           | 16 | 27148.898      | 1696.806    |         |          |                                                                                                |
|                  | Corrected Total | 23 | 162164.897     |             |         |          |                                                                                                |
| Furfuryl alcohol | Temperature     | 1  | 54856.578      | 54856.578   | 30.426  | 4.70E-05 | At 0.05 level, the population means of Temperature are significantly different                 |
|                  | Concentration   | 3  | 69027.373      | 23009.124   | 12.762  | 1.63E-04 | At 0.05 level, the population means of Concentration are significantly different               |
|                  | Interaction     | 3  | 15379.896      | 5126.632    | 2.843   | 0.071    | At 0.05 level, the interaction between Temperature and Concentration is <b>not</b> significant |
|                  | Model           | 7  | 139263.847     | 19894.835   | 11.035  | 4.42E-05 |                                                                                                |
|                  | Error           | 16 | 28847.476      | 1802.967    |         |          |                                                                                                |
|                  | Corrected Total | 23 | 168111.322     |             |         |          |                                                                                                |

when  $p\text{-value} > \alpha$ , do not reject  $H_0$ . when  $p\text{-value} < \alpha$ , reject  $H_0$ .

**Table S2.** Two-way ANOVA analysis for the acidic compounds at  $\alpha = 0.05$ .

| Test Component | Parameter       | DF | Sum of Squares | Mean square | F-value | p-value  | Summary                                                                                         |
|----------------|-----------------|----|----------------|-------------|---------|----------|-------------------------------------------------------------------------------------------------|
| Furoic acid    | Temperature     | 1  | 79837.284      | 79837.284   | 125.271 | 2.28E-08 | At 0.05 level, the population means of Temperature are significantly different.                 |
|                | Concentration   | 3  | 66466.525      | 22155.508   | 34.764  | 9.68E-07 | At 0.05 level, the population means of Concentration are significantly different.               |
|                | Interaction     | 3  | 1952.958       | 650.986     | 1.021   | 0.413    | At 0.05 level, the interaction between Temperature and Concentration is <b>not</b> significant. |
|                | Model           | 7  | 169875.631     | 24267.947   | 38.078  | 4.66E-08 |                                                                                                 |
|                | Error           | 14 | 8922.445       | 637.317     |         |          |                                                                                                 |
|                | Corrected Total | 21 | 178798.075     |             |         |          |                                                                                                 |
| Glycolic acid  | Temperature     | 1  | 9525.427       | 9525.427    | 6.037   | 0.027    | At 0.05 level, the population means of Temperature are significantly different.                 |
|                | Concentration   | 3  | 88900.678      | 29633.559   | 18.781  | 2.44E-05 | At 0.05 level, the population means of Concentration are significantly different.               |
|                | Interaction     | 3  | 19634.095      | 6544.698    | 4.148   | 0.025    | At 0.05 level, the interaction between Temperature and Concentration is significant.            |
|                | Model           | 7  | 119384.999     | 17055.000   | 10.809  | 7.24E-05 |                                                                                                 |
|                | Error           | 15 | 23667.397      | 1577.826    |         |          |                                                                                                 |
|                | Corrected Total | 22 | 143052.396     |             |         |          |                                                                                                 |
| Levulinic acid | Temperature     | 1  | 3647.190       | 3647.190    | 1.255   | 0.280    | At 0.05 level, the population means of Temperature are <b>not</b> significantly different.      |
|                | Concentration   | 3  | 39561.508      | 13187.169   | 4.536   | 0.019    | At 0.05 level, the population means of Concentration are significantly different.               |
|                | Interaction     | 3  | 27892.110      | 9297.370    | 3.198   | 0.054    | At 0.05 level, the interaction between Temperature and Concentration is <b>not</b> significant. |
|                | Model           | 7  | 72924.234      | 10417.748   | 3.583   | 0.018    |                                                                                                 |
|                | Error           | 15 | 43607.336      | 2907.156    |         |          |                                                                                                 |
|                | Corrected Total | 22 | 116531.570     |             |         |          |                                                                                                 |

when  $p\text{-value} > \alpha$ , do not reject  $H_0$ . when  $p\text{-value} < \alpha$ , reject  $H_0$ .

**Table S3.** Two-way ANOVA analysis for the phenolic compounds at  $\alpha = 0.05$ .

| Test Component | Parameter       | DF | Sum of Squares | Mean square | F-value | p-value  | Summary                                                                                         |
|----------------|-----------------|----|----------------|-------------|---------|----------|-------------------------------------------------------------------------------------------------|
| Syringaldehyde | Temperature     | 1  | 25334.977      | 25334.977   | 4.569   | 0.049    | At 0.05 level, the population means of Temperature are significantly different.                 |
|                | Concentration   | 3  | 50851.194      | 16950.398   | 3.057   | 0.061    | At 0.05 level, the population means of Concentration are <b>not</b> significantly different.    |
|                | Interaction     | 3  | 2131.473       | 710.491     | 0.128   | 0.942    | At 0.05 level, the interaction between Temperature and Concentration is <b>not</b> significant. |
|                | Model           | 7  | 83425.170      | 11917.882   | 2.149   | 0.101    |                                                                                                 |
|                | Error           | 15 | 83167.597      | 5544.506    |         |          |                                                                                                 |
|                | Corrected Total | 22 | 166592.768     |             |         |          |                                                                                                 |
| Vanillin       | Temperature     | 1  | 125309.949     | 125309.949  | 46.883  | 7.97E-06 | At 0.05 level, the population means of Temperature are significantly different.                 |
|                | Concentration   | 3  | 381035.992     | 127011.997  | 47.520  | 1.38E-07 | At 0.05 level, the population means of Concentration are significantly different.               |
|                | Interaction     | 3  | 39898.862      | 13299.621   | 4.976   | 0.015    | At 0.05 level, the interaction between Temperature and Concentration is significant.            |
|                | Model           | 7  | 565606.774     | 80800.968   | 30.231  | 2.08E-07 |                                                                                                 |
|                | Error           | 14 | 37419.226      | 2672.802    |         |          |                                                                                                 |
|                | Corrected Total | 21 | 603026.000     |             |         |          |                                                                                                 |
| Phenol         | Temperature     | 1  | 152045.245     | 152045.245  | 50.560  | 2.47E-06 | At 0.05 level, the population means of Temperature are significantly different.                 |
|                | Concentration   | 3  | 378002.746     | 126000.915  | 41.899  | 8.37E-08 | At 0.05 level, the population means of Concentration are significantly different.               |
|                | Interaction     | 3  | 335699.595     | 111899.865  | 37.210  | 1.92E-07 | At 0.05 level, the interaction between Temperature and Concentration is significant.            |
|                | Model           | 7  | 865747.586     | 123678.227  | 41.127  | 4.65E-09 |                                                                                                 |
|                | Error           | 16 | 48115.922      | 3007.245    |         |          |                                                                                                 |
|                | Corrected Total | 23 | 913863.508     |             |         |          |                                                                                                 |

when  $p\text{-value} > \alpha$ , do not reject  $H_0$ . when  $p\text{-value} < \alpha$ , reject  $H_0$ .

**Table S4.** Two-way ANOVA analysis for the process-wastewater at  $\alpha = 0.05$ .

| Test Component     | Parameter       | DF | Sum of Squares | Mean square | F-value | p-value  | Summary                                                                                         |
|--------------------|-----------------|----|----------------|-------------|---------|----------|-------------------------------------------------------------------------------------------------|
| Process-wastewater | Temperature     | 1  | 10131.647      | 10131.647   | 9.210   | 0.008    | At 0.05 level, the population means of Temperature are significantly different.                 |
|                    | Concentration   | 3  | 67126.135      | 22375.378   | 20.341  | 1.52E-05 | At 0.05 level, the population means of Concentration are significantly different.               |
|                    | Interaction     | 3  | 6994.642       | 2331.547    | 2.120   | 0.141    | At 0.05 level, the interaction between Temperature and Concentration is <b>not</b> significant. |
|                    | Model           | 7  | 86876.637      | 12410.948   | 11.283  | 5.62E-05 |                                                                                                 |
|                    | Error           | 15 | 16500.218      | 1100.015    |         |          |                                                                                                 |
|                    | Corrected Total | 22 | 103376.855     |             |         |          |                                                                                                 |

when  $p\text{-value} > \alpha$ , do not reject  $H_0$ . when  $p\text{-value} < \alpha$ , reject  $H_0$ .
